# Supplementary material for: Selective oxidation of glucose–galactose syrup to gluconic and galactonic acids
Source: Royal Society of Chemistry journal article supplement (doi:10.1039/d5gc01381j), 2025-01-01
Supplement: d5gc01381j1.pdf [file d5gc01381j1.pdf]

## Supporting Information

### *Oxidation of Acid-Whey Derived Glucose-Galactose Syrup to Gluconic and Galactonic Acid with Selective Precipitation*

Joseph Install<sup>a</sup>, Anže Zupanc<sup>a</sup>, Seonyeong Kim<sup>b</sup>, Wenjia Wang<sup>b</sup>, Marianna Kemell<sup>a</sup>, George Huber<sup>b</sup>, Timo Repo<sup>a\*</sup>

**a)** Department of Chemistry, University of Helsinki, A. I. Virtasen aukio 1, P.O. Box 55, 00014 Helsinki (Finland), E-mail: [timo.repo@helsinki.fi](mailto:timo.repo@helsinki.fi).

**b)** Department of Chemical and Biological Engineering, University of Wisconsin Madison; Madison, WI 53706, USA

\*Corresponding author: [timo.repo@helsinki.fi](mailto:timo.repo@helsinki.fi)

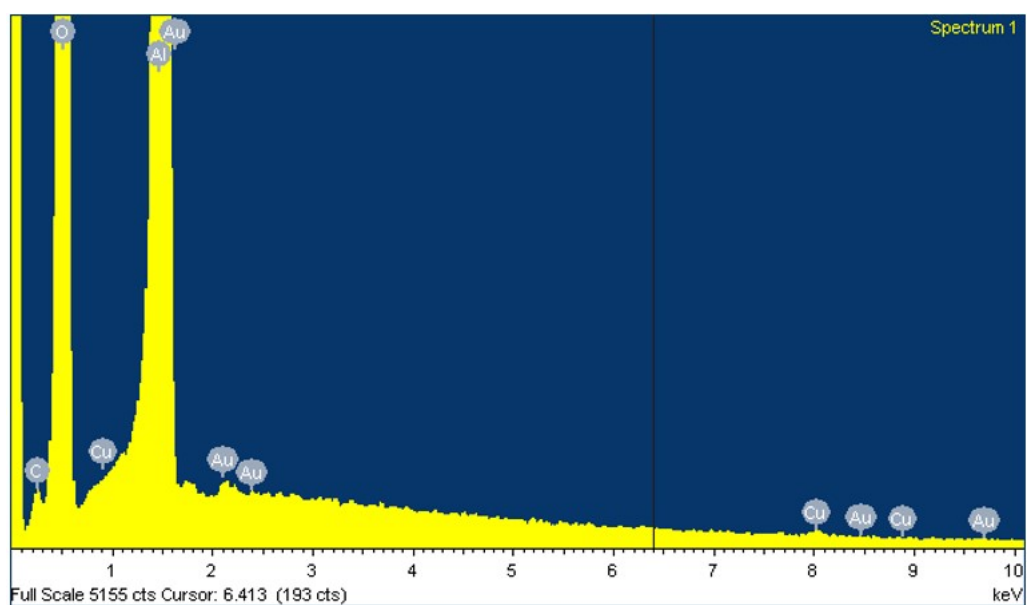

Figure S1 EDS Spectrum of Au/Al<sub>2</sub>O<sub>3</sub> measured on Oxford INCA 350 energy-dispersive X-ray microanalysis system

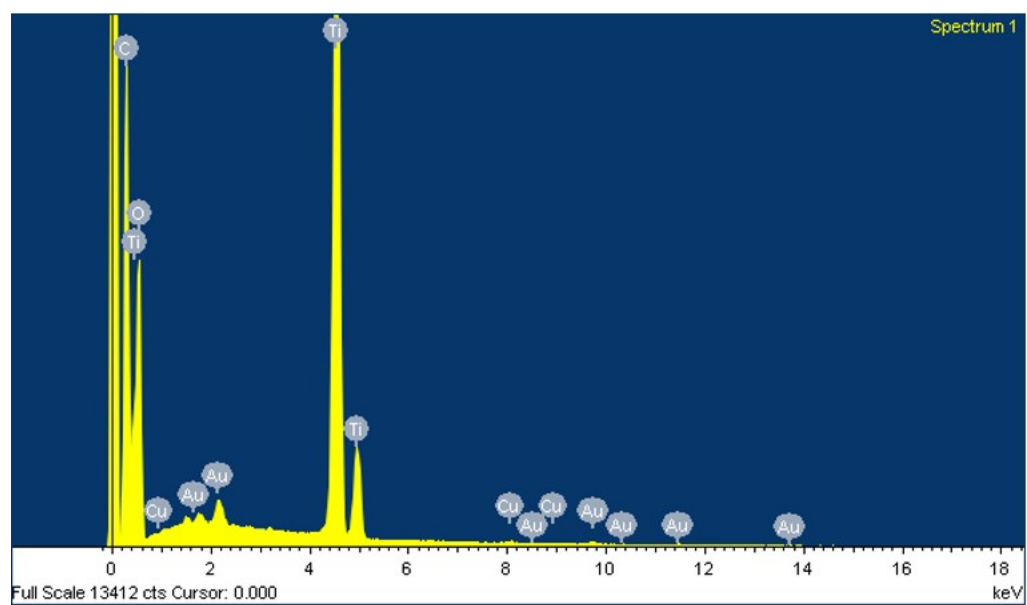

Figure S2 EDS Spectrum of Au/TiO<sub>2</sub> measured on Oxford INCA 350 energy-dispersive X-ray microanalysis system

## General Oxidation Experimental Procedure

A simulation feed of the GGS syrup was prepared in situ to ensure that accurate quantifications could be obtained, 90mg glucose, 90mg galactose, 30mg of lactose and 18mg of the selected catalyst were loaded into the 45mL Parr reactor with 10 mL of water added. If O<sub>2</sub> was the required oxidant the reactor was purged 3 times before charging to desired pressure, if H<sub>2</sub>O<sub>2</sub> was used then a N<sub>2</sub> atmosphere was obtained by purging in an identical manner. The reaction temperature was raised to 80°C as under constant heating power and then maintained for the desired reaction time. After completion the reaction was cooled then returned to atmospheric pressure. The reaction mixture was centrifuged to separate catalyst and a sample was obtained for HPLC analysis. Standard of sodium gluconate (>99% purity, TCI Chemicals), D-galactonic acid calcium salt (99% purity, Sigma Aldrich) and calcium D-saccharate tetra-hydrate (98.5% purity, Sigma Aldrich) were passed through an ion-exchanger to acidify before creating an external calibration curve for quantifying gluconic, galactonic and glucaric acid in the product mixtures.

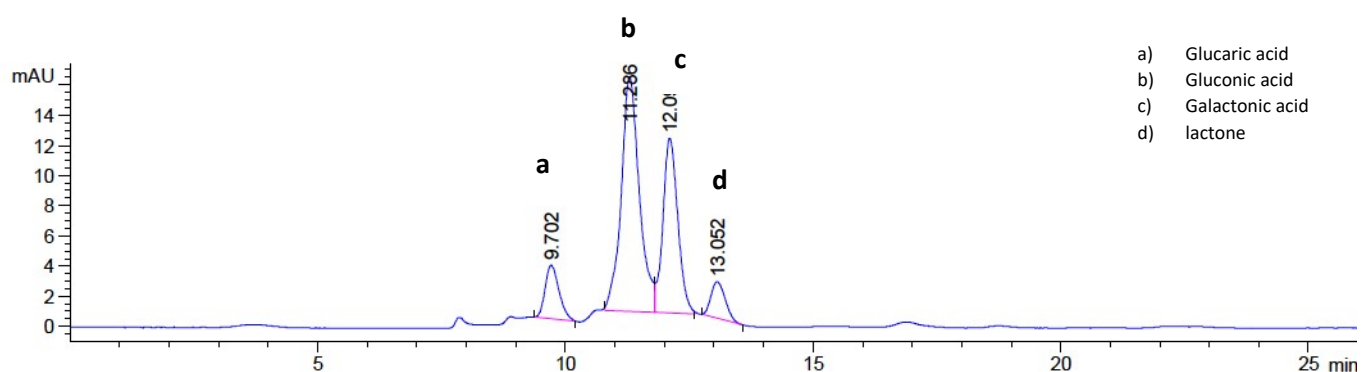

Figure S3 Sample HPLC Chromatogram of GGS oxidation reaction mixture using the UV Detector (210nm).

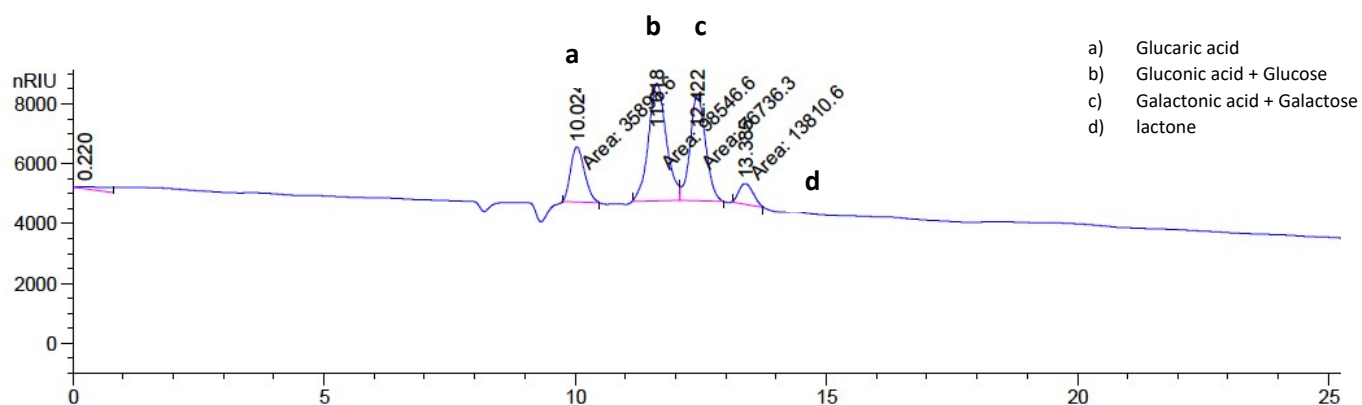

Figure S4 HPLC Chromatogram of GGS oxidation reaction mixture using the RID Detector (Positive Mode)

$$\text{Conversion of glucose} : \frac{\text{mol of glucose in GGS solution}}{\text{mol of glucose in product mixture}} \times 100 \quad (1)$$

$$\text{Conversion of galactose} : \frac{\text{mol of galactose in GGS solution}}{\text{mol of galactose in product mixture}} \times 100 \quad (2)$$

$$\text{Selectivity of Gluconic Acid} : \frac{\text{mol of glucose converted in GGS}}{\text{mol of gluconic acid in product mixture}} \times 100 \quad (3)$$

$$\text{Selectivity of Galactonic Acid} : \frac{\text{mol of galactose converted in GGS}}{\text{mol of galactonic in product mixture}} \times 100 \quad (4)$$

Table S1 Yields and Conversions for Oxidation of GGS using H<sub>2</sub>O<sub>2</sub> and O<sub>2</sub> as oxidant. . Reaction Conditions: 90mg Glucose, 90mg Galactose, 30mg Lactose, 18mg Catalyst, 10mL H<sub>2</sub>O at 80°C for 24hr

| Oxidant                                 | Gluconic Acid Yield / % | Galactonic Acid Yield / % | Glucaric Acid Yield / % | Glucose Conversion / % | Galactose Conversion / % |
|-----------------------------------------|-------------------------|---------------------------|-------------------------|------------------------|--------------------------|
| H <sub>2</sub> O <sub>2</sub> (4 Equiv) | 66%                     | 51%                       | 7%                      | 96%                    | 92%                      |
| O <sub>2</sub> (2.5 bar)                | 71%                     | 52%                       | 7%                      | 98%                    | 95%                      |

| Oxidant                                 | Mass Glucose Converted / mg | Mass Galactose Converted / mg | Mass of Gluconic Acid / mg | Mass of Galactonic Acid / mg | Mass of Glucaric Acid / mg | Total Mass of Products / mg |
|-----------------------------------------|-----------------------------|-------------------------------|----------------------------|------------------------------|----------------------------|-----------------------------|
| H <sub>2</sub> O <sub>2</sub> (4 Equiv) | 88.6                        | 82.0                          | 66.5                       | 50.2                         | 7.2                        | 124.0                       |
| O <sub>2</sub> (2.5bar)                 | 88.5                        | 88.5                          | 70.0                       | 53.0                         | 7.7                        | 130.8                       |

Table S2 Mass of Products for Oxidation of GGS using H<sub>2</sub>O<sub>2</sub> and O<sub>2</sub> as oxidants. Reaction Conditions: 90mg Glucose, 90mg Galactose, 30mg Lactose, 18mg Catalyst, 10mL H<sub>2</sub>O at 80°C for 24hr

| Catalyst                          | Dispersion / % | Time / hr | Temperature / °C | Conversion / % | TOF / h <sup>-1</sup> |
|-----------------------------------|----------------|-----------|------------------|----------------|-----------------------|
| Au/Al <sub>2</sub> O <sub>3</sub> | 16             | 24        | 80               | 96%            | 285.4                 |
| Au/TiO <sub>2</sub>               | 16             | 24        | 80               | 98%            | 65.3                  |

*Table S3 Turnover Frequencies for Prepared Catalysts. Reaction Conditions: 90mg Glucose, 90mg Galactose, 30mg Lactose, 18mg Catalyst, 10mL H<sub>2</sub>O*

$$TOF = \frac{n_{car} \times conv.}{n_{Au} \times D_{Au} \times t} \quad (5)$$

Where  $n_{car}$  is total moles of carbohydrate,  $conv.$  is conversion of reaction,  $n_{Au}$  is the total number of Au moles calculated from weight percentage and mass of catalyst,  $D_{Au}$  is the dispersion of Au on the support<sup>1</sup>, and  $t$  is the time of reaction.

The dispersion was calculated from the particle size distribution for the prepared catalysts and allowed for the turnover frequency (TOF) to be calculated accordingly to the formula 5<sup>1</sup>. For Au/Al<sub>2</sub>O<sub>3</sub> it had an increased TOF compared to Au/TiO<sub>2</sub> which is logical as the calculated loading was lower (1 wt% for Au/Al<sub>2</sub>O<sub>3</sub> and 3 wt% for Au/TiO<sub>2</sub>), marking it as a more efficient catalyst.

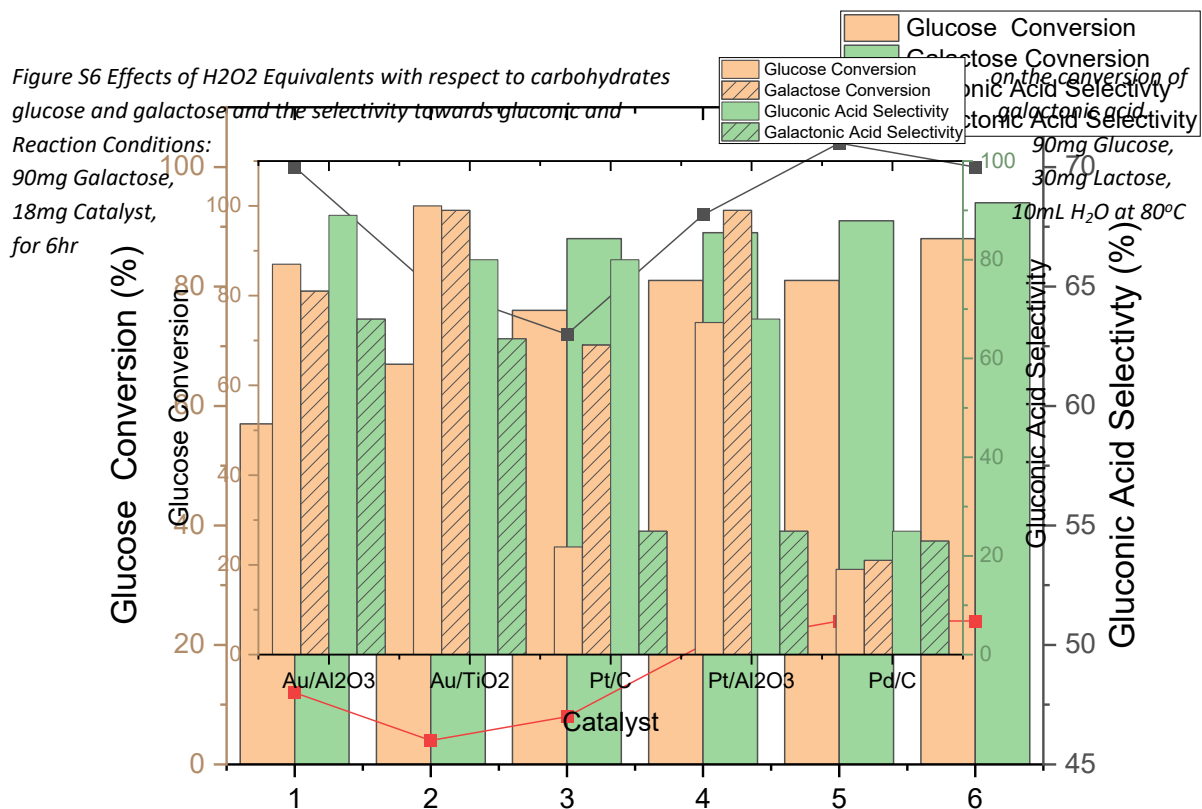

**Figure S5 Effect of catalyst on the conversion of glucose and galactose and the selectivity to gluconic and galactonic acid using O<sub>2</sub> as oxidant.** Reaction Conditions: 90mg Glucose, 90mg Galactose, 30mg Lactose, 18mg Catalyst, 10mL H<sub>2</sub>O with 5.0 bar O<sub>2</sub> at 80°C for 24hr

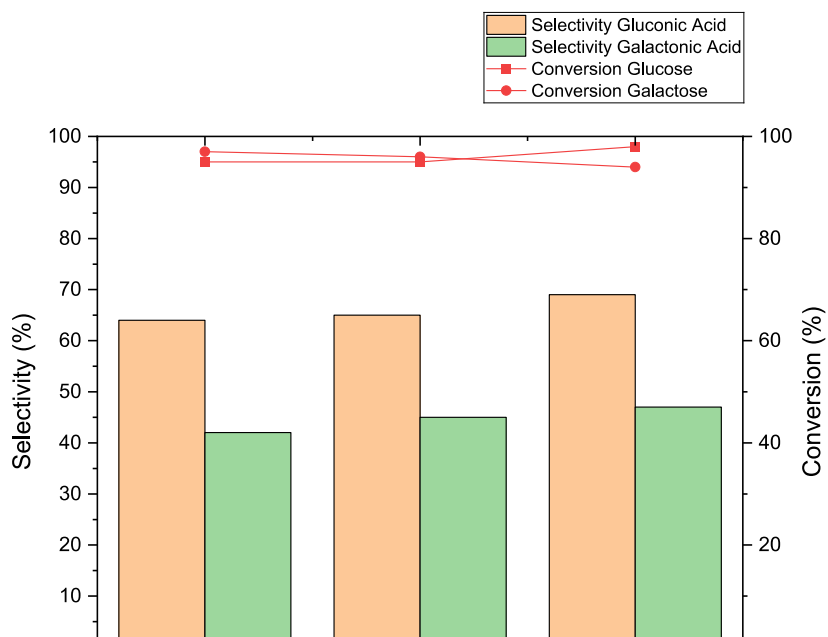

**Figure S7 Reaction Repeats for the oxidation of GGS using H<sub>2</sub>O<sub>2</sub> as the oxidant.** Reaction Conditions: 90mg Glucose, 90mg Galactose, 30mg Lactose, 18mg Catalyst, 4 equiv. H<sub>2</sub>O<sub>2</sub>, 10mL H<sub>2</sub>O at 80°C for 6hr

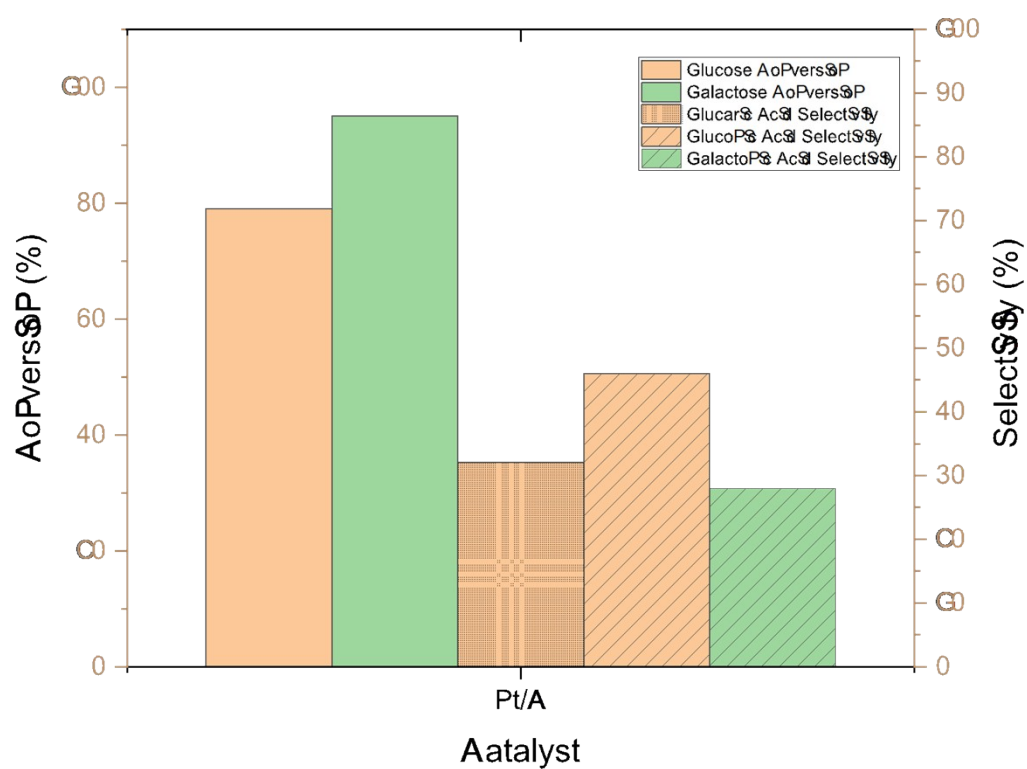

Figure S8 Reaction products when using Pt/C as catalyst. Reaction Conditions: 90mg Glucose, 90mg Galactose, 30mg Lactose, 18mg Catalyst Pt/C, 10mL H<sub>2</sub>O with 5.0 bar O<sub>2</sub> at 80°C for 24hr

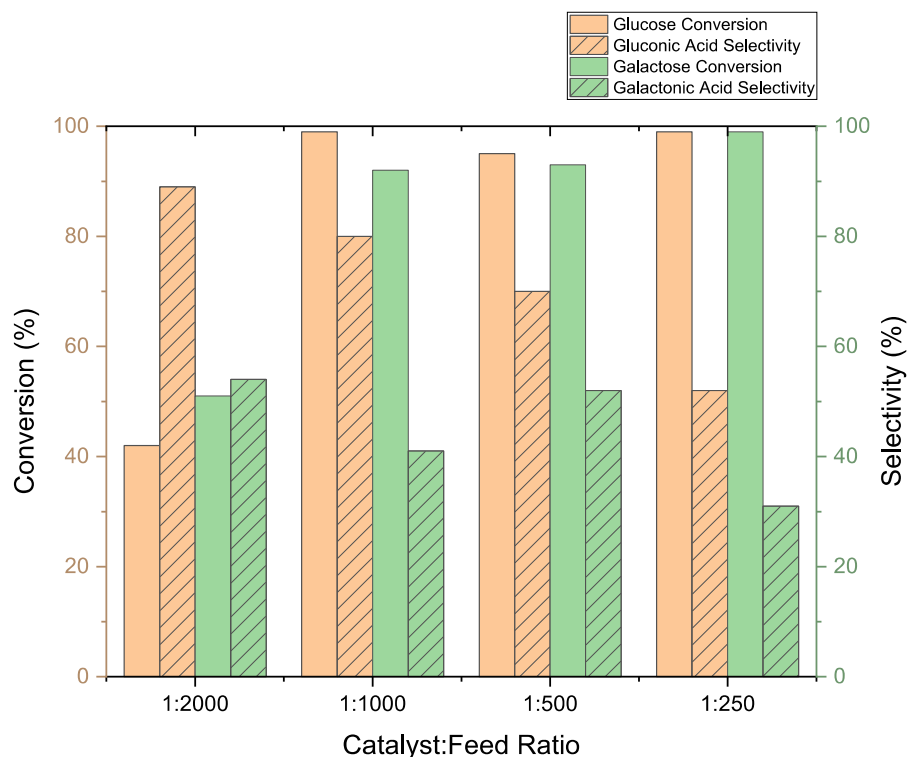

Figure S9 Effect of catalyst:feed on the conversion of glucose and galactose and the selectivity to gluconic and galactonic acid using  $O_2$  as oxidant. Reaction Conditions: 90mg Glucose, 90mg Galactose, 30mg Lactose, 18mg Catalyst, 10mL  $H_2O$  with 5.0 bar  $O_2$  at 80°C for 24hr

Table S4 Influence of Catalyst:Feed to the carbon balance and carbon loss of the oxidation of GGS. Reaction Conditions:

| Catalyst:Feed | TOTAL C mmol | Total Carbon Mass / mg | Total Carbon ppm | Carbon Balance / % | Recorded C ppm | Total C ppm | % Lost |
|---------------|--------------|------------------------|------------------|--------------------|----------------|-------------|--------|
| 1:1000        | 5.23         | 62.81                  | 6611.71          | 0.79               | 84.15          | 8415.00     | 0.12   |
| 1:500         | 5.28         | 63.39                  | 6672.41          | 0.85               | 78.42          | 7842.00     | 0.18   |
| 1:250         | 3.84         | 46.12                  | 4854.54          | 0.67               | 72.34          | 7234.00     | 0.23   |

90mg Glucose, 90mg Galactose, 30mg Lactose, 18mg Catalyst, 10mL  $H_2O$  with 5.0 bar  $O_2$  at 80°C for 24hr



### Effect of Al<sub>2</sub>O<sub>3</sub> Particle size

When trying to assess the influence of the catalyst support, various particle size Al<sub>2</sub>O<sub>3</sub> were sampled for catalyst preparation and their respective activity for the oxidation of GGS. The influence of particle size to conversion and selectivity of GGS are summarised in Table S2. The trend observed was increasing particle size decreases the selectivity to desired products. The particle size will influence the Au particle size as well as the accessibility and structure of the active site for substrates to enter. In addition, the surface area also decreases which may explain the observed reduction in conversion, the surface area intuitively decreases as particle size of support increases.

| Al <sub>2</sub> O <sub>3</sub><br>Particle Size<br>(nm) | Glucose<br>Conversion<br>(%) | Galactose<br>Conversion<br>(%) | Selectivity<br>Gluconic Acid<br>(%) | Selectivity<br>Galactonic Acid<br>(%) |
|---------------------------------------------------------|------------------------------|--------------------------------|-------------------------------------|---------------------------------------|
| 20                                                      | 46                           | 33                             | 75                                  | 56                                    |
| 40                                                      | 48                           | 53                             | 46                                  | 32                                    |
| 300                                                     | 42                           | 36                             | 46                                  | 52                                    |

sion & selectivity of GGS oxidations

Table  
S5  
Influence of  
Al<sub>2</sub>O<sub>3</sub>  
Support  
Particle Size  
on the conver

### Separation of GGS oxidation reaction products procedure

After oxidation is completed, the resulting mixture is centrifuged at 5000rpm for 5 mins to separate the solid catalyst from solution where it is recovered. 5 equivalents of  $\text{CaCO}_3$  are added to the solution and stirred for 2 hrs to form calcium gluconate and calcium galactonate. The slurry is then filtered to remove excess  $\text{CaCO}_3$ . The resulting aqueous solution is evaporated under reduced pressure with the addition of EtOH to promote water removal. Once minimal volume is reached, 200mL EtOH is added to precipitate the calcium carboxylate salts which are recovered by filtration.  $^1\text{H}$  NMR (400MHz  $\text{D}_2\text{O}$ ) is used to establish the ratio of ca-gluconate:ca-galactonate (Figure S11). The salt mixture is then dissolved in minimal  $\text{H}_2\text{O}$  before adding 20mg ca-galactonate to aide crystallisation and cooling to  $0^\circ\text{C}$  and allowing to precipitate overnight. The resulting precipitate is ca-galactonate with >99% purity and in solution remains ca-gluconate with minimal ca-galactonate impurities. To recover the ca-gluconate, the solvent amount is reduced before adding EtOH to precipitate out the salts. The purity is then assessed by  $^1\text{H}$  NMR (Figure S12), with ca-gluconate exhibiting 86% purity with the major impurity being ca-galactonate. Ca-galactonate:  $^1\text{H}$  NMR (400 MHz,  $\text{D}_2\text{O}$ ):  $\delta$  4.31–4.26 (m, 1H), 4.02–3.94 (m, 2H), 3.74–3.68 (m, 2H), 3.68–3.62 (m, 1H). Ca-gluconate:  $^1\text{H}$  NMR (400 MHz,  $\text{D}_2\text{O}$ ):  $\delta$  4.19 (d,  $J = 3.4$  Hz, 1H), 4.11–4.05 (m, 1H), 3.87–3.73 (m, 3H), 3.73–3.61 (m, 1H).

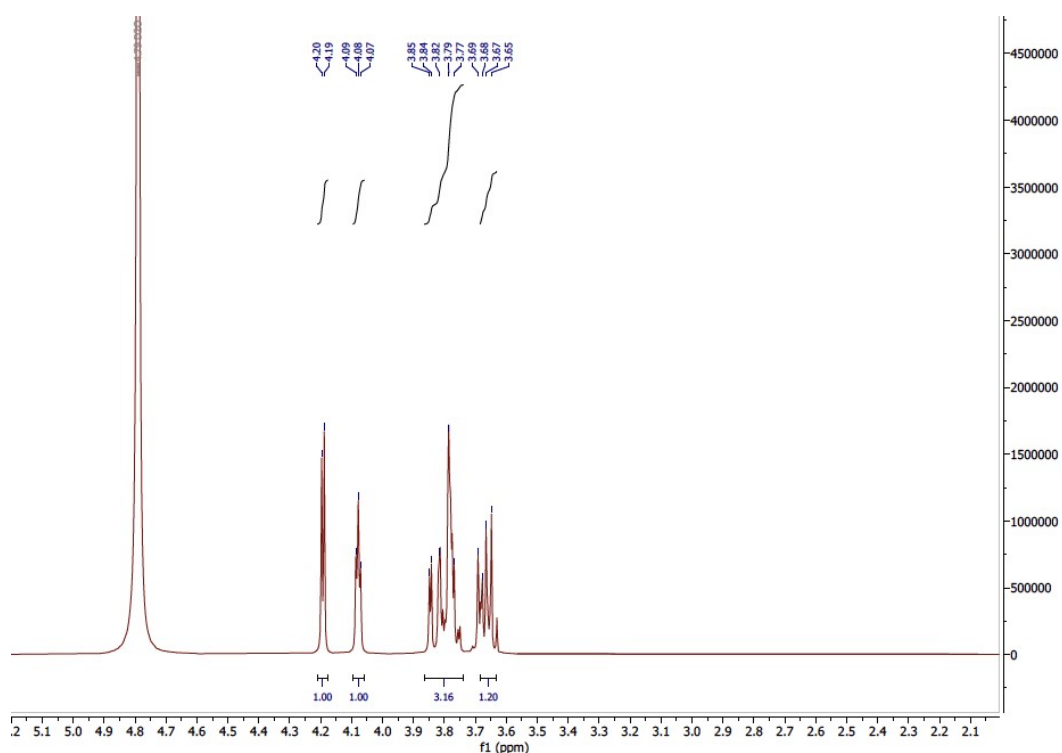

Figure S10  $^1\text{H}$  NMR (400 MHz  $\text{D}_2\text{O}$ ) of Ca-gluconate standard

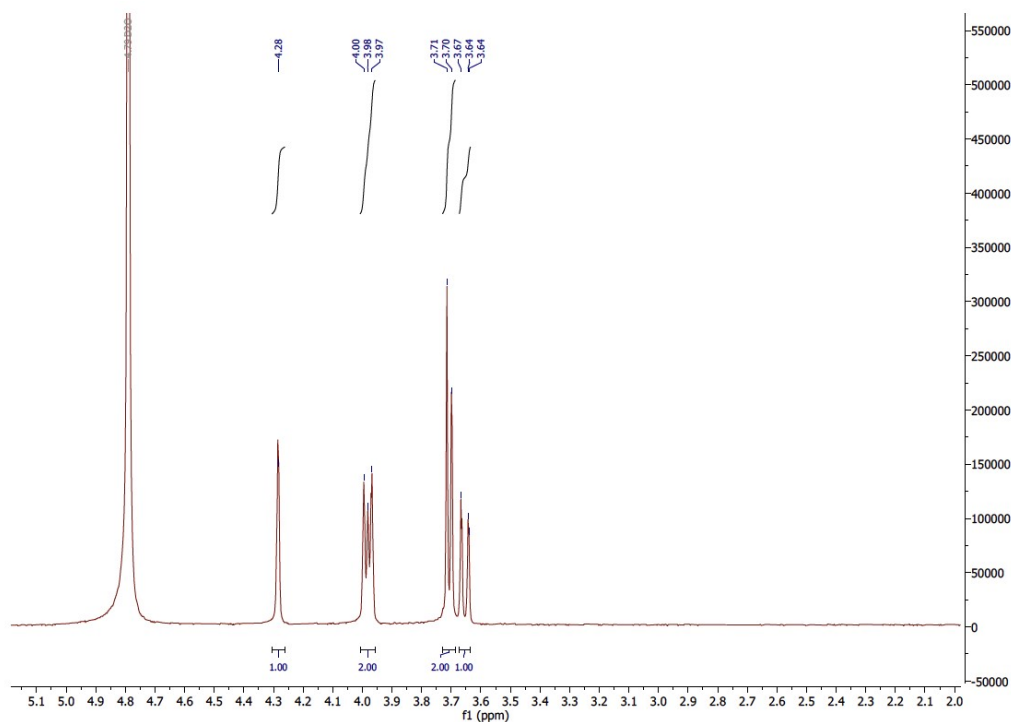

Figure S11  $^1\text{H}$  NMR (400 MHz  $\text{D}_2\text{O}$ ) of Ca-galactonate standard

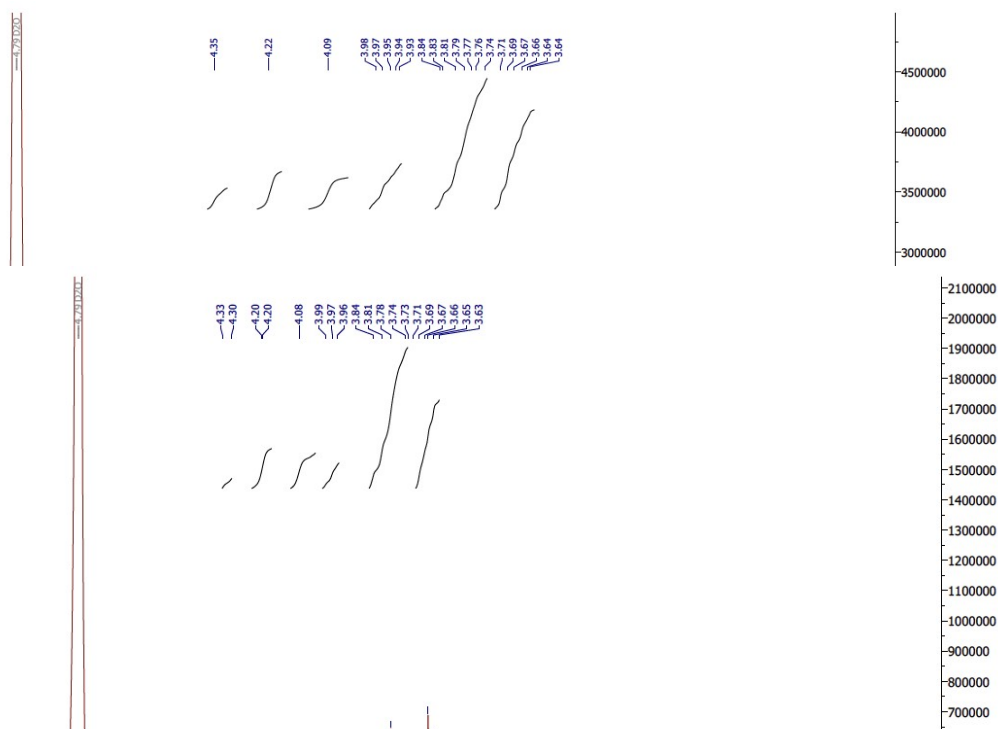

Figure S12  $^1\text{H}$  NMR (400 MHz  $\text{D}_2\text{O}$ ) of salt mixture of Ca-gluconate and Ca after initial precipitation from reaction mixture

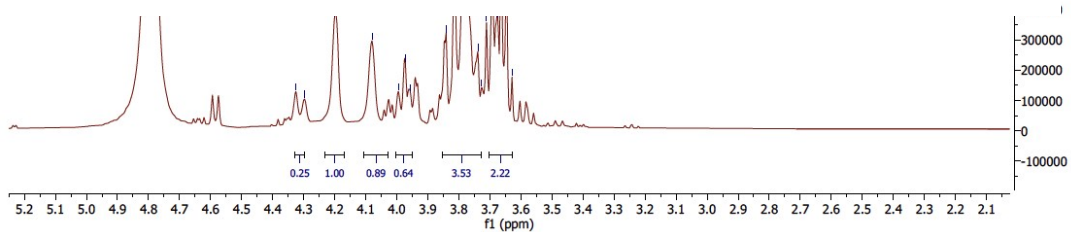

## References

- 1 I. V. Delidovich, B. L. Moroz, O. P. Taran, N. V. Gromov, P. A. Pyrjaev, I. P. Prosvirin, V. I. Bukhtiyarov and V. N. Parmon, *Chemical Engineering Journal*, 2013, **223**, 921–931.
